# Supplementary material for: Oxyanion doping strategies to enhance the ionic conductivity in Ba2In2O5
Source: Royal Society of Chemistry journal article supplement (doi:10.1039/c0jm01978j), 2010-11-12
Supplement: c0jm01978j.pdf [file c0jm01978j.pdf]

Supplementary information: Oxyanion doping strategies to enhance the ionic conductivity in  
 $\text{Ba}_2\text{In}_2\text{O}_5$

Rietveld refinement of X-ray diffraction data for  $\text{Ba}_2\text{In}_{1.7}\text{P}_{0.3}\text{O}_{5.3}$

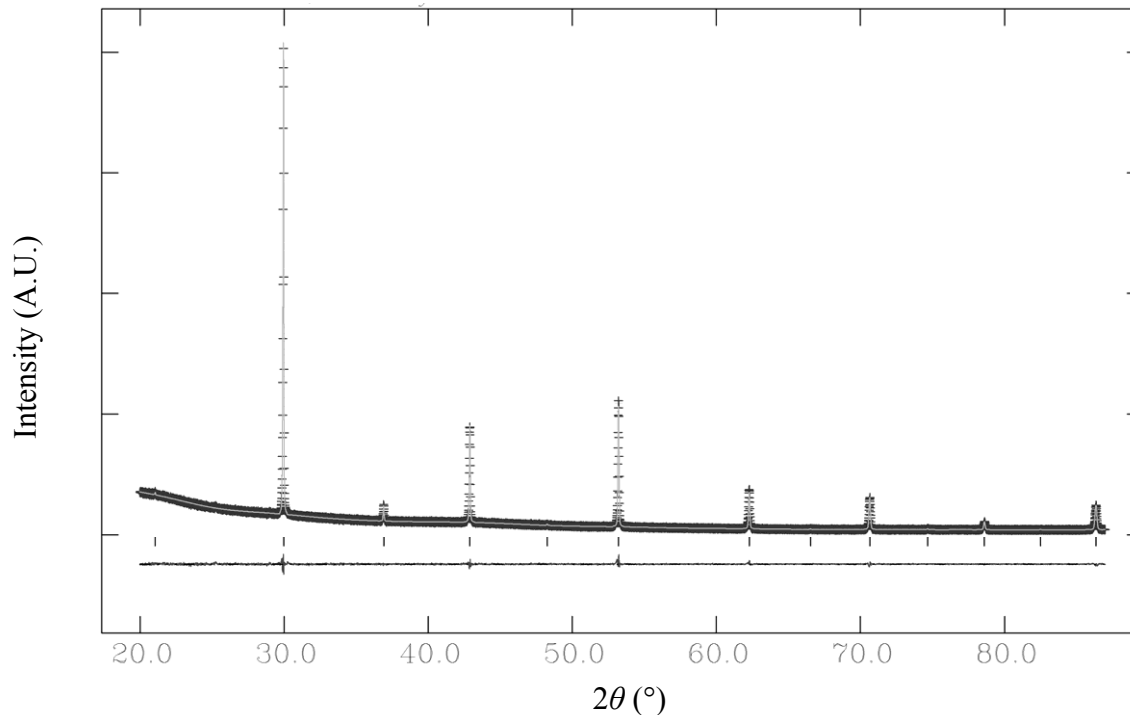

Observed (cross), calculated (line), reflection positions and difference plots (observed – calculated) of  $\text{Ba}_2\text{In}_{1.7}\text{P}_{0.3}\text{O}_{5.3}$  from the Rietveld refinement for room temperature X-ray diffraction data.

Refined crystal structure  $\text{Ba}_2\text{In}_{1.7}\text{P}_{0.3}\text{O}_{5.3}$  with cubic  $Pm\bar{3}m$  (221) space group, from room temperature X-ray diffraction data.

|    |      | $a$ (Å)  | $R_{wp}$ | $R_p$ | $\chi^2$             |                                  |
|----|------|----------|----------|-------|----------------------|----------------------------------|
|    |      | 4.208(1) | 2.98     | 2.09  | 1.34                 |                                  |
|    |      | $x$      | $y$      | $z$   | Fractional occupancy | $U_{iso}$ (Å <sup>2</sup> x 100) |
| Ba | 1(b) | ½        | ½        | ½     | 1.000                | 1.36(2)                          |
| In | 1(a) | 0        | 0        | 0     | 0.842(3)             | 1.79(5)                          |
| P  | 1(a) | 0        | 0        | 0     | 0.158(3)             | 1.79(5)                          |
| O  | 3(d) | 0        | 0        | ½     | 0.833                | 4.30(20)                         |

Rietveld refinement of X-ray diffraction data for Ba<sub>2</sub>In<sub>1.7</sub>S<sub>0.3</sub>O<sub>5.45</sub>

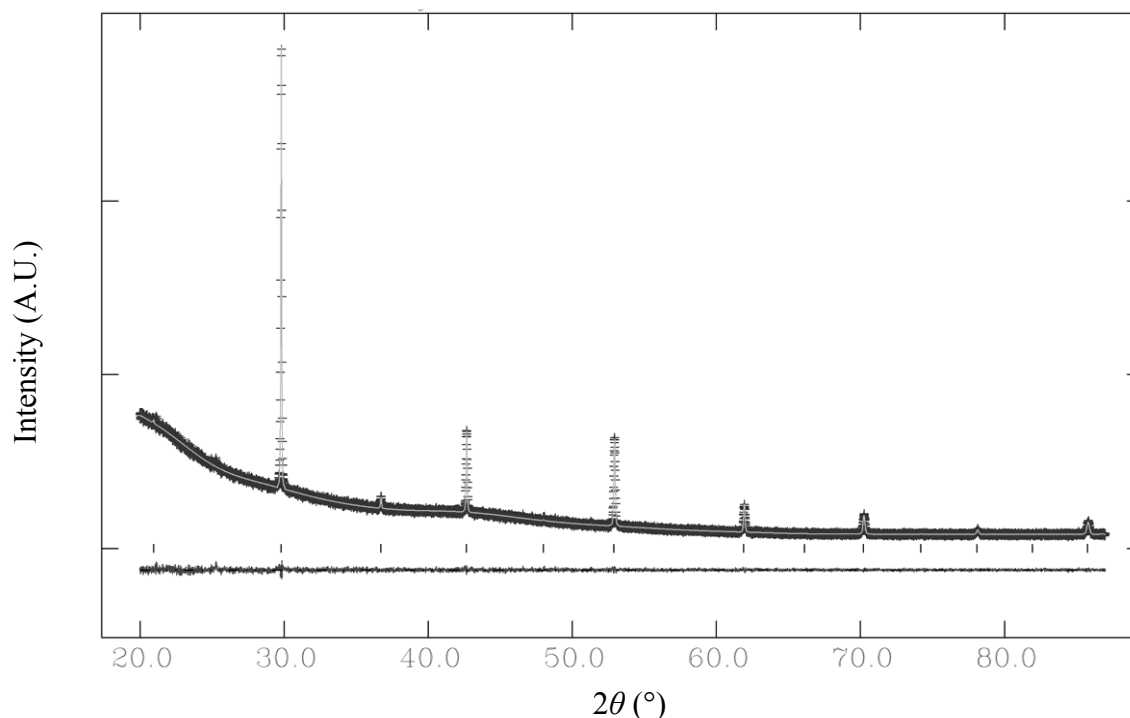

Observed (cross), calculated (line), reflection positions and difference plots (observed – calculated) of Ba<sub>2</sub>In<sub>1.7</sub>S<sub>0.3</sub>O<sub>5.45</sub> from the Rietveld refinement for room temperature X-ray diffraction data.

Refined crystal structure of Ba<sub>2</sub>In<sub>1.7</sub>S<sub>0.3</sub>O<sub>5.45</sub> using cubic *Pm3m* (221) space group using room temperature X-ray diffraction data.

|    |      | $a$ (Å)  | $R_{wp}$ | $R_p$ | $\chi^2$             |                                  |
|----|------|----------|----------|-------|----------------------|----------------------------------|
|    |      | 4.227(1) | 2.69     | 1.94  | 1.093                |                                  |
|    |      | $x$      | $y$      | $z$   | Fractional occupancy | $U_{iso}$ (Å <sup>2</sup> x 100) |
| Ba | 1(b) | ½        | ½        | ½     | 1.000                | 0.85(5)                          |
| In | 1(a) | 0        | 0        | 0     | 0.868(9)             | 2.17(16)                         |
| S  | 1(a) | 0        | 0        | 0     | 0.133(9)             | 2.17(16)                         |
| O  | 3(d) | 0        | 0        | ½     | 0.908                | 8.42(48)                         |

Representative impedance data

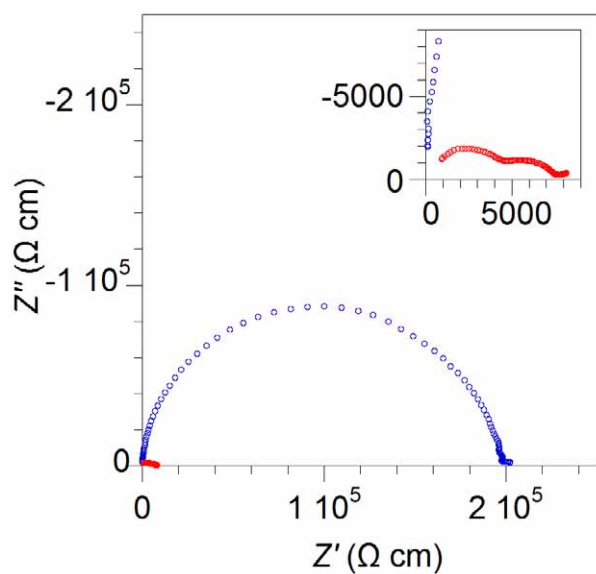

Complex impedance plane plots for Ba<sub>2</sub>In<sub>1.7</sub>P<sub>0.3</sub>O<sub>5.3</sub> at 270 °C dry (blue) and wet (red). The zoom in of the wet data are also shown in the insert.
